# Supplementary material
Source: publisher figshare collection journal article supplement (https://gsapubs.figshare.com/ndownloader/files/34909341)
Supplement: Supplementary file 1 [file 34909341]

## Sheet: Sheet1
Table S3
Major- and trace-element analytical data.																									s
Sample no.	07HT-37-1	07HT-37-2	07HT-37-3	07HT-37-4	07HL-37-5	07HT-38-1	07HT-38-2	07HT-38-3	07HT-38-4	07HT-38-5	11YL-2	11YL-3	11YL-4	11YL-5	11YL-6	13WKL-32(1)	13WKL-32(2)	15YL-1	15YL-2	15YL-3	15YL-4	15YL-5	15YL-6		Wang, C., Liu, L., Yang, W.-Q., Cao, Y.-T., and Smithies, R.H., 2022, Mafic magma driven magmatic processes and compositional variation in granitic pluton construction: The Buya intrusion of West Kunlun, Northwestern China: Geosphere, v. 18, https://doi.org/10.1130/GES02451.1
Rock-type	PQS	PQS	PQS	PQS	PQS	ME	ME	ME	ME	ME	FG	FG	FG	FG	FG	mafic sheet	mafic sheet	mafic dyke	mafic dyke	GD	GD	GD	Granitic vein
SiO2	64.58	66.91	67.62	66.11	66.36	61.62	53.35	58.33	53.16	53.74	72.27	72.36	73.45	73.1	71.73	57.4	54	59.4	59.73	60	64.5	62.19	68.65
TiO2	0.57	0.3	0.31	0.32	0.38	0.61	0.82	0.51	0.96	0.93	0.26	0.3	0.25	0.28	0.31	0.58	0.85	0.45	0.45	0.68	0.39	0.46	0.18
Al2O3	15.41	15.87	15.82	15.61	15.68	14.5	11.78	12.72	14.03	12.93	15.1	15.43	14.26	14.62	15.36	11.38	13.55	12.04	12.5	15.12	16.01	16.47	15.64
TFe2O3	4.5	2.86	2.62	2.9	3.27	5.03	7.09	6.08	7.78	7.99	1.71	1.64	1.76	1.4	1.63	5.9141	7.44308	5.49	5.53	6.65	3.77	4.71	1.74
MnO	0.09	0.05	0.05	0.06	0.06	0.09	0.18	0.14	0.14	0.16	0.017	0.015	0.021	0.013	0.027	0.12	0.12	0.14	0.15	0.15	0.09	0.1	0.03
MgO	1.91	1.18	1.09	1.16	1.37	3.73	8.73	6.17	6.66	6.91	0.28	0.29	0.23	0.21	0.23	7.9	6.48	5.43	5.03	3.25	1.79	2.22	0.71
CaO	3.44	2.51	2.32	2.79	2.67	4.32	7.87	5.94	8.8	8.55	1.32	1.3	1.4	1.35	1.29	6.91	8.62	6.77	6.04	4.68	3.17	3.66	1.11
Na2O	4.93	4.76	4.86	6.29	4.59	3.95	2.91	2.66	4.04	3.75	3.9	3.42	4.33	4.37	4.35	1.56	3.72	2.47	2.84	4.8	5.15	5.21	4.38
K2O	3.34	4.5	4.28	2.39	4.65	4.61	4.33	5.84	2.06	2.49	4.18	4.29	3.86	3.78	4.02	6.92	3.01	6.04	5.92	3.1	3.69	3.59	6.39
P2O5	0.22	0.15	0.15	0.18	0.16	0.49	0.57	0.38	0.93	0.91	0.065	0.072	0.07	0.061	0.076	0.42	0.97	0.42	0.39	0.36	0.2	0.23	0.05
LOI	0.57	0.51	0.45	1.73	0.69	0.66	1.96	0.81	0.99	1.16	0.71	0.67	0.42	0.58	0.7	0.86	1.18	1.19	1.13	0.88	1.11	0.91	1.08
TOTAL	99.56	99.6	99.57	99.54	99.88	99.61	99.59	99.58	99.55	99.52	99.812	99.787	100.051	99.764	99.723	99.96	99.94	99.84	99.71	99.67	99.87	99.75	99.96
Li	29.8623	17.6962	17.6572	42.4553	17.342	34.3145	67.6594	19.6925	42.7652	31.06	23.0336	24.964	17.8687	7.37021	17.4423	24.4	25.3	27.7077	27.2487	34.2503	28.7189	29.6302	11.1085
Be	7.33629	5.97561	7.99839	7.74537	6.29799	5.15442	6.56693	6.38599	5.41489	6.24079	7.79257	5.69626	9.53461	4.82961	7.78542	3.44	5.67	4.79819	6.72609	8.09366	7.14603	7.6561	4.74921
Sc	6.78306	4.39613	4.07816	4.46331	5.23709	9.55819	17.3755	17.2575	17.5636	18.5839	8.09223	7.89749	8.18023	7.9281	9.22429	19.6	10.8	19.0846	17.8406	12.3082	6.72076	8.53147	1.70481
V	72.7226	42.2532	38.9083	43.6644	50.8508	98.431	151.29	115.368	185.218	181.8	8.43666	10.7639	9.41449	5.3657	8.44835	130	178	109.983	105.914	119.133	65.2642	83.6654	19.8445
Cr	40.9362	27.272	25.4552	26.3345	28.9047	84.3893	476.476	379.982	185.179	232.124	0	2.29901	0	0	0.772271	596	155	240.849	228.507	59.832	33.7344	42.2752	11.7094
Co	103.552	141.999	129.064	118.365	108.846	83.3707	56.0696	66.6699	65.2816	71.1407	147.779	154.377	155.9	228.38	203.428	28.1	30.1	42.602	34.2697	38.6846	33.4002	30.2879	54.973
Ni	19.4701	11.9209	11.2888	10.9686	12.832	58.868	181.718	63.1833	85.0125	92.3239	2.89369	5.52186	3.25008	2.5854	4.32133	74.8	76.5	38.372	35.221	33.2739	17.508	22.0883	7.46646
Cu	4.20675	1.80521	1.62944	2.53822	3.3408	4.76491	2.30015	1.80725	2.41861	2.66675	1.45757	2.43285	0.485519	1.76718	0.869391	6.77	12.7	31.4039	12.1708	8.3036	2.04712	6.59221	2.43739
Zn	52.3502	30.9082	33.2047	45.1287	42.4325	64.6624	109.633	70.7377	85.985	94.0312	37.0226	40.8604	24.6375	11.3073	26.3742	67.4	85.3	75.7151	79.1742	92.6341	56.9538	68.0488	20.2159
Ga	22.6948	22.2012	22.8697	22.742	22.4412	21.728	20.7958	22.4351	26.0662	26.424	18.1896	19.7333	20.3355	14.642	19.8037	18.2	22.4	17.4483	18.5238	23.5803	20.2942	23.2344	17.6077
Ge	1.60299	1.4499	1.63934	1.21471	1.30837	1.39248	2.01102	1.82398	2.01931	1.99274	0.710407	0.774314	0.822471	0.681742	0.803657	1.54	1.57	1.70434	1.75281	1.56342	1.28807	1.44249	1.01004
Rb	141.227	167.326	178.784	149.161	167.728	251.404	293.523	352.996	187.574	159.439	245.121	231.167	197.871	162.811	211.238	430	205	253.387	260.148	150.038	141.159	157.327	191.128
Sr	1122.16	1178.98	1101.23	1088.61	1173.63	1030.66	685.339	673.941	1204.83	931.681	769.898	722.455	752.156	721.138	723.591	668	1320	859.273	885.326	905.923	1135.86	1119.97	408.625
Y	23.9707	15.5355	14.0256	17.1288	17.6482	16.1067	22.4194	18.198	22.8293	22.5779	8.2155	6.72639	6.47296	5.21883	6.51013	18.7	22	16.3886	17.1117	28.2006	16.4638	19.7797	5.1352
Zr	318.768	204.862	212.904	211.906	231.612	210.503	166.631	240.246	240.484	167.732	139.323	135.416	134.126	91.8189	132.062	260	211	115.738	173.63	350.214	211.695	267.202	82.2878
Nb	25.4717	16.898	18.2204	19.7434	18.999	17.6263	19.278	13.1325	23.5689	20.222	11.5428	12.5495	14.8032	9.46409	11.1644	11.4	26.3	10.7657	12.224	25.2472	17.3123	21.2108	11.4668
Cs	3.45824	3.41104	3.64376	4.6322	2.52713	4.82128	7.32981	4.69659	5.11817	3.29238	5.32671	4.00568	5.23679	2.81211	2.35633	7.21	5.55	5.24245	4.14026	3.94297	3.33532	3.97539	2.99005
Ba	843.576	1275.8	1097.93	906.63	1433.55	1150.87	929.299	1058.32	687.461	774.706	1556.03	1455.24	1101.09	1404.77	1152.64	874	1040	1254.98	1230.43	651.492	1284.39	1036.6	427.73
La	99.827	60.217	54.5841	61.7204	73.9014	86.2304	95.4993	84.6308	137.42	139.762	27.1363	34.2387	31.8527	11.8719	32.1267	45.8	131	97.9913	98.6524	104.551	67.5517	76.7454	22.4484
Ce	188.776	115.864	104.704	117.507	138.368	165.443	189.45	164.898	272.156	274.663	48.5825	59.9176	56.0734	21.6362	56.9462	114	281	176.606	179.402	200.448	127.223	148.191	44.6419
Pr	18.7208	11.8986	10.912	12.0699	14.0919	16.9529	20.1906	16.7841	29.0487	29.3222	5.52958	6.52594	6.35424	2.41188	6.2906	15.6	32.9	17.9162	18.437	22.0108	13.671	16.6958	4.64662
Nd	72.8187	43.8862	40.3834	45.0316	51.9161	66.7026	77.1592	62.4883	111.572	112.942	19.5677	21.4615	20.6674	8.20012	20.4157	64.4	120	65.6426	67.3432	83.0424	50.0723	56.6001	15.9517
Sm	11.945	7.42461	6.89132	7.74799	8.65966	10.0592	12.8735	10.251	17.8602	18.0259	3.75237	3.68655	3.44907	1.63285	3.45958	13.4	20.2	9.99743	10.2669	13.4248	7.88714	9.17626	2.41071
Eu	2.56198	1.70923	1.59459	1.8144	1.98559	2.15951	2.52856	1.73043	3.83468	3.75805	0.62189	0.576508	0.547821	0.194605	0.56345	3.08	4.01	2.1811	2.18811	2.86601	1.90528	2.12469	0.542359
Gd	8.52663	5.46102	5.03439	5.84206	6.35436	6.91674	9.4496	7.61189	12.09	12.1523	2.10379	1.88383	1.70948	0.907855	1.66739	9.75	12.4	7.84062	8.04868	10.0576	5.90021	6.91798	1.74489
Tb	0.976741	0.632714	0.594206	0.685437	0.746258	0.73133	1.06163	0.839479	1.24675	1.23769	0.375484	0.341772	0.322633	0.183875	0.314208	1.09	1.42	0.824299	0.854823	1.16781	0.679184	0.789064	0.195777
Dy	4.71723	3.0218	2.76513	3.27222	3.46609	3.35874	4.76419	3.75468	5.20271	5.19342	1.5265	1.236	1.1555	0.836871	1.1584	4.89	5.74	3.61508	3.71281	5.50082	3.16329	3.80336	0.947374
Ho	0.797857	0.513911	0.465994	0.569838	0.596963	0.552105	0.785225	0.624313	0.806116	0.800392	0.291724	0.231042	0.206181	0.176619	0.224203	0.72	0.91	0.559068	0.578954	0.937542	0.540136	0.635727	0.159579
Er	1.91972	1.27152	1.1356	1.39762	1.46481	1.32646	1.85051	1.51271	1.85898	1.83274	0.801602	0.700199	0.643997	0.507352	0.640665	1.56	1.98	1.36515	1.42147	2.46239	1.45178	1.70694	0.462731
Tm	0.255765	0.177622	0.155095	0.195077	0.202462	0.17136	0.241095	0.203903	0.232307	0.22679	0.089134	0.072674	0.079685	0.065587	0.066774	0.21	0.26	0.174243	0.183132	0.339177	0.20172	0.231846	0.0680713
Yb	1.63197	1.13264	0.987163	1.24015	1.26438	1.08367	1.43441	1.29161	1.36772	1.34641	0.60832	0.508039	0.521419	0.462505	0.487974	1.3	1.54	1.05009	1.09837	2.09454	1.25132	1.50879	0.493081
Lu	0.243195	0.162431	0.145588	0.182009	0.181961	0.164037	0.201651	0.195482	0.191858	0.193677	0.087927	0.073209	0.081643	0.071231	0.067205	0.18	0.22	0.158875	0.170686	0.308695	0.186134	0.222	0.0811545
Hf	7.49991	5.25762	5.67653	5.36382	5.84905	5.23517	4.40762	6.28071	5.26853	4.34328	3.6835	3.98183	4.23396	2.75861	3.91331	7.04	5.74	3.13564	4.18188	8.47967	5.31071	6.48207	3.1521
Ta	2.08629	1.38126	1.38936	1.50798	1.47884	1.24281	1.4777	0.521762	1.31194	1.05275	0.954217	1.09031	1.20795	0.927991	1.04007	0.86	2.02	0.674129	0.642182	1.60539	1.19944	1.35171	1.03375
Pb	24.1151	25.794	30.3173	26.5134	28.0941	23.578	21.3822	30.176	21.5186	20.9056	57.9823	53.8461	65.943	53.6996	61.6994	30.2	27.4	29.3403	32.1031	30.8186	37.8241	35.0211	28.1606
Th	37.4524	25.1537	24.9648	36.3807	28.4308	33.9625	31.7555	36.9173	56.0911	35.7236	22.2574	18.0997	24.1917	18.7581	19.0925	24.8	41.5	29.3367	29.9221	39.5419	31.3402	34.1124	37.3428
U	4.99219	4.30845	4.97815	6.02206	4.77696	6.69565	8.15056	6.49087	10.6216	7.04754	7.1905	5.82174	6.86055	7.94271	6.50674	7.44	10.4	3.58186	3.90027	5.96092	4.24848	4.77418	6.25765
Mg#	49.7277	49.0195	49.2272	48.2455	49.4026	63.3456	74.1573	70.2823	66.6111	66.8379	27.6203	29.1835	23.3454	25.9026	24.7466	75.6872	66.9853	69.7431	67.9465	53.2484	52.5284	52.3458	48.7429
Eu/Eu*	0.7761	0.820635	0.82765	0.824477	0.818327	0.79149	0.700879	0.598892	0.797806	0.776263	0.67668	0.668803	0.689731	0.488648	0.717214	0.823796	0.774607	0.753149	0.735887	0.75405	0.853866	0.815263	0.808451
Sr/Y	46.8136	75.8898	78.5158	63.5546	66.5015	63.9898	30.569	37.0337	52.7756	41.2651	93.7128	107.406	116.2	138.18	111.148	35.7219	60	52.431	51.7381	32.1242	68.9912	56.6224	79.5734
K2O/Na2O	0.677485	0.945378	0.880658	0.379968	1.01307	1.16709	1.48797	2.19549	0.509901	0.664	1.07179	1.25439	0.891455	0.864989	0.924138	4.4359	0.80914	2.44534	2.08451	0.645833	0.716505	0.68906	1.4589
(La/Yb)N	43.8769	38.1354	39.6623	35.6988	41.9254	57.0774	47.7559	47.0001	72.0698	74.4581	31.9977	48.3416	43.8188	18.4121	47.2248	25.271	61.017	66.9362	64.4256	35.8047	38.7231	36.4859	32.6564
A/CNK	0.857085	0.919222	0.939121	0.866896	0.899176	0.749665	0.495325	0.591724	0.564017	0.529724	1.13194	1.2214	1.02987	1.06446	1.10883	0.503105	0.540925	0.525547	0.56661	0.765167	0.878252	0.861819	0.969032
Major-oxide concentrations in wt.% , original XRF totals given.
TFe2O3 = total Fe as Fe2O3.
Mg#=100 Mg/(Mg+Fe).
Eu anomalies (Eu/Eu* = EuN/(SmN ×GdN)0.5 (N denotes normalized to primitive mantle from Sun and McDonough (1989)
Trace-element concentrations in ppm by weight.
